# Supplementary material for: MoS2/cellulose paper coupled with SnS2 quantum dots as 2D/0D electrode for high-performance flexible supercapacitor
Source: Royal Society of Chemistry journal article supplement (doi:10.1039/d1nj00364j), 2021-01-01
Supplement: d1nj00364j1.pdf [file d1nj00364j1.pdf]

## MoS<sub>2</sub>/Cellulose Paper Coupled with SnS<sub>2</sub> Quantum Dots as 2D/0D Electrode for High-Performance Flexible Supercapacitor

Prasanth K. Enaganti<sup>1,2</sup>, Venkatarao Selamneni<sup>2</sup>, Parikshit Sahatiya<sup>2\*</sup> and Sanket Goel<sup>1,2\*</sup>

<sup>1</sup>MEMS, Microfluidics and Nanoelectronics Lab, Department of Electrical and Electronics Engineering, BITS-Pilani, Hyderabad Campus, Hyderabad, India 500078

<sup>2</sup>Department of Electrical and Electronics Engineering, BITS-Pilani, Hyderabad Campus, Hyderabad, India 500078

\*Corresponding authors: [sgoel@hyderabad.bits-pilani.ac.in](mailto:sgoel@hyderabad.bits-pilani.ac.in)  
[parikshit@hyderabad.bits-pilani.ac.in](mailto:parikshit@hyderabad.bits-pilani.ac.in)

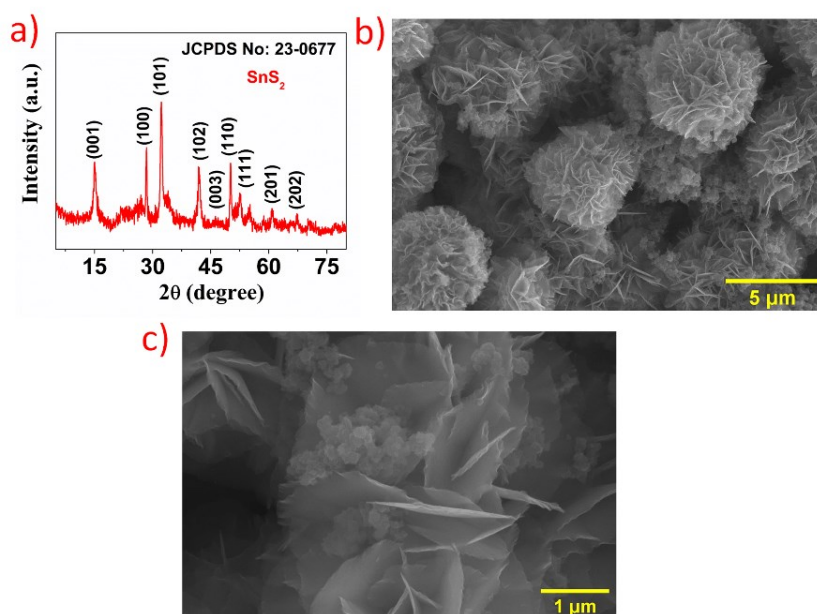

Figure S1: a) XRD pattern of synthesized SnS<sub>2</sub> b, c) FESEM images of synthesized SnS<sub>2</sub>.

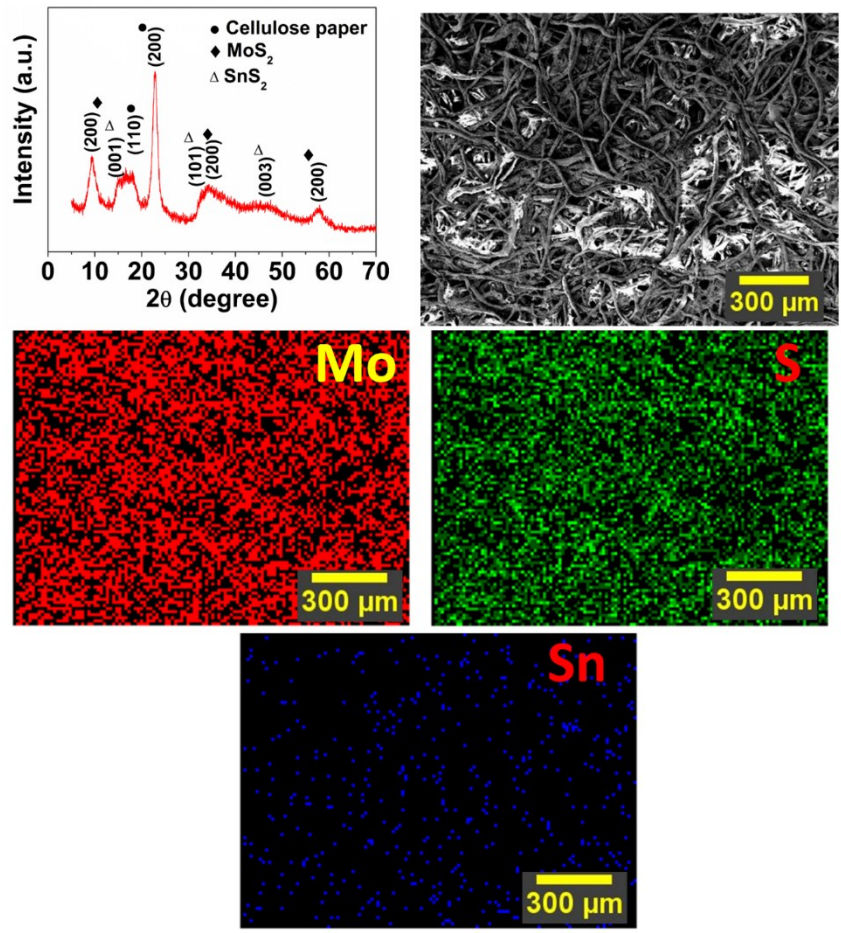

Figure S2: a) XRD pattern of SnS<sub>2</sub>QDs/MoS<sub>2</sub>/paper b-d) Elemental mapping images of fabricated SnS<sub>2</sub> QDs/MoS<sub>2</sub>/paper.
